# Supplementary material
Source: MDPI journal article supplement (https://www.mdpi.com/2227-9717/11/3/879)
Supplement: s1 [file s1]

# Application of Plant Surfactants as Cleaning Agents in Shampoo Formulations

**Káren G. O. Bezerra<sup>1,2,3</sup>, Hugo M. Meira<sup>2,3</sup>, Bruno O. Veras<sup>4</sup>, Thaysa C. M. Stamford<sup>4</sup>, Emanuel L. Fernandes<sup>5</sup>, Attilio Converti<sup>6</sup>, Raquel D. Rufino<sup>3</sup>, Leonie A. Sarubbo<sup>2,3\*</sup>**

<sup>1</sup> Northeastern Network of Biotechnology, Federal Rural University of Pernambuco, Rua Dom Manuel de Medeiros, s/n, Dois Irmãos - CEP: 52171-900, Recife, Pernambuco, Brazil

<sup>2</sup> Advanced Institute of Technology and Innovation (IATI), Rua Potira, n. 31, Prado, CEP: 50751-310, Recife, Pernambuco, Brazil

<sup>3</sup> Universidade Católica de Pernambuco (UNICAP), Rua do Príncipe, n. 526, Boa Vista, CEP: 50050-900, Recife, Pernambuco, Brazil

<sup>4</sup> Federal University of Pernambuco, Av. Prof. Moraes Rego, 1235 – Cidade Universitária, CEP: 50.670-90, Recife, Pernambuco, Brazil

<sup>5</sup> Sertão Integration Faculty, Rua João Luiz de Melo, 2110 - Tancredo Neves, CEP: 56909-205, Serra Talhada, Pernambuco, Brazil

<sup>6</sup> Dipartimento di Ingegneria Civile, Chimica e Ambientale, Università degli Studi di Genova (UNIGE), Via Opera Pia, n. 15, 16145, Genoa, Italy

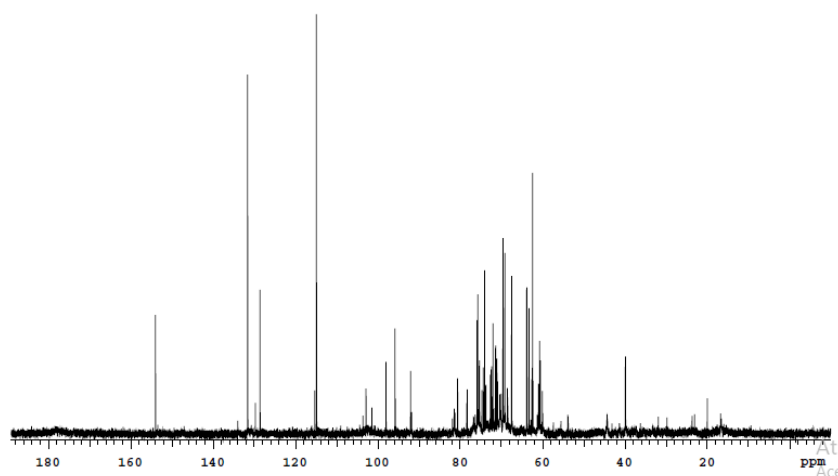

**Figure S1.**  $^{13}\text{C}$  NMR spectrum ( $\text{D}_2\text{O}$ , 300 MHz) of standard saponin from Sigma.

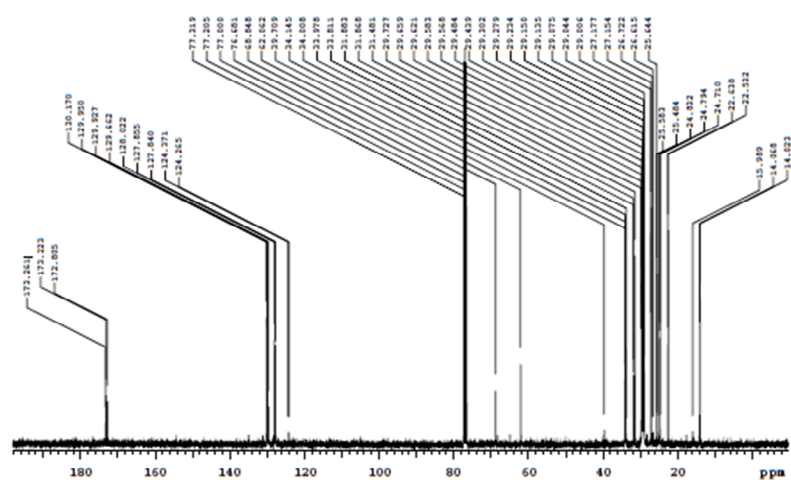

Figure S2.  $^{13}\text{C}$  NMR spectrum ( $\text{CDCl}_3$ , 300 MHz) of saponin from *Chenopodium quinoa*.

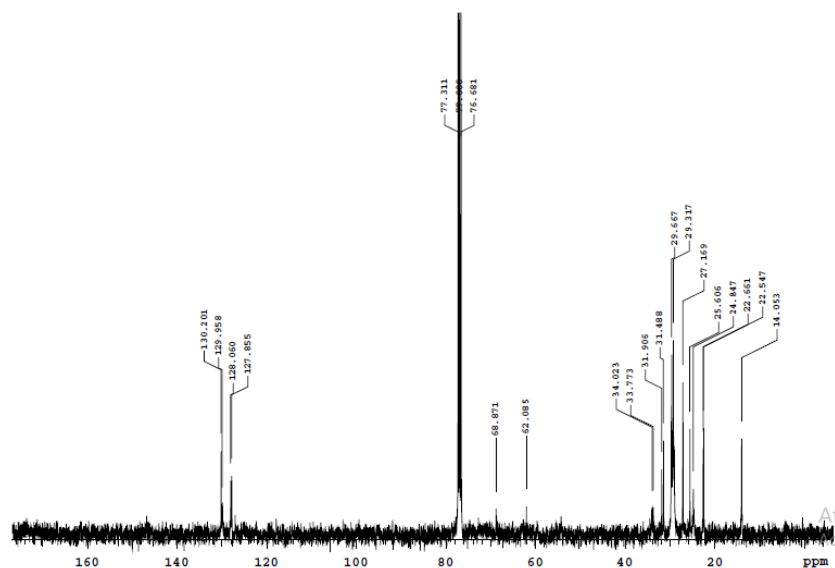

Figure S3.  $^{13}\text{C}$  NMR spectrum ( $\text{CDCl}_3$ , 300 MHz) of saponin from *Glycine max*.

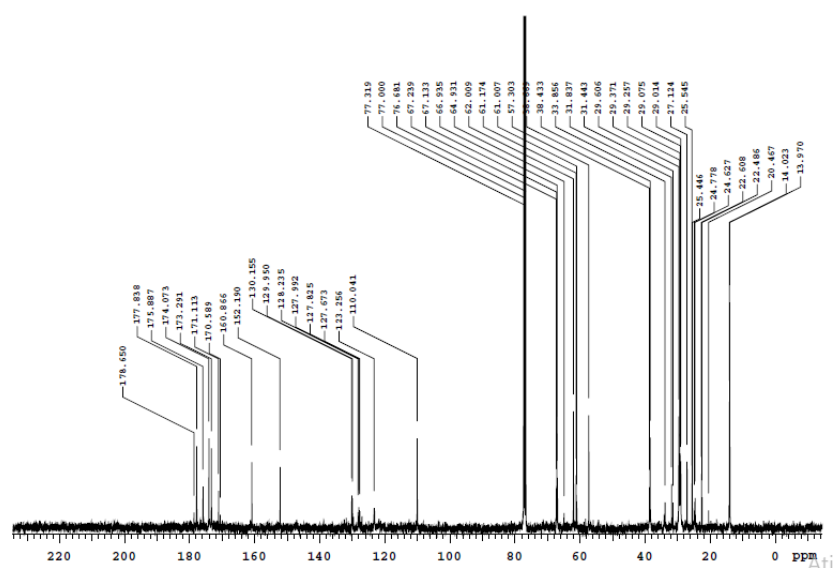

Figure S4.  $^{13}\text{C}$  NMR spectrum ( $\text{CDCl}_3$ , 300 MHz) of saponin from *Malpighia emarginata*.
